# Supplementary material for: Undisclosed SEC Investigations
Source: Atypon-hosted journal article supplement (doi:10.1287/mnsc.2020.3805), 2020-10-29
Supplement: mnsc.2020.3805.sm1.pdf [file mnsc.2020.3805.sm1.pdf]

## **Internet Appendix for Blackburne, Kepler, Quinn, and Taylor (2020)**

This appendix contains additional analyses referenced in our paper, and is organized as follows:

- Analysis of who sells around SEC investigation openings (Table IA1)
- Analysis of insider selling conditional on subsequent investigation disclosure (Table IA2)
- Falsification tests: insider purchasing and stock market reaction (Table IA3)

**Table IA1. Who Trades Around Undisclosed Investigations**

| <b>Panel A. Officers</b>  |                                                                        |                    |                                                                       |                   |
|---------------------------|------------------------------------------------------------------------|--------------------|-----------------------------------------------------------------------|-------------------|
|                           | Dependent Variable:<br><i>InsiderSalesVolume_Officer<sub>i,t</sub></i> |                    | Dependent Variable:<br><i>Pr(InsiderSeller_Officer<sub>i,t</sub>)</i> |                   |
| Variable                  | (1)                                                                    | (2)                | (3)                                                                   | (4)               |
| <i>Day[0,+10]* Severe</i> | 0.015**<br>(2.46)                                                      | 0.013**<br>(2.32)  | 0.007**<br>(2.04)                                                     | 0.008**<br>(2.31) |
| <i>Day[0,+10]</i>         | -0.010*<br>(-1.87)                                                     | -0.010*<br>(-1.94) | -0.000<br>(-0.12)                                                     | -0.001<br>(-0.55) |
| Controls                  | yes                                                                    | yes                | yes                                                                   | yes               |
| Date Effects              | no                                                                     | yes                | no                                                                    | yes               |
| Firm-quarter Effects      | no                                                                     | yes                | no                                                                    | yes               |
| <i>F</i>                  | 3.853                                                                  | 3.184              | 12.26                                                                 | 10.22             |
| <i>N-obs</i>              | 105,169                                                                | 105,169            | 105,169                                                               | 105,169           |

  

| <b>Panel B. Independent Directors</b> |                                                                         |                   |                                                                        |                   |
|---------------------------------------|-------------------------------------------------------------------------|-------------------|------------------------------------------------------------------------|-------------------|
|                                       | Dependent Variable:<br><i>InsiderSalesVolume_IndepDir<sub>i,t</sub></i> |                   | Dependent Variable:<br><i>Pr(InsiderSeller_IndepDir<sub>i,t</sub>)</i> |                   |
| Variable                              | (1)                                                                     | (2)               | (3)                                                                    | (4)               |
| <i>Day[0,+10]* Severe</i>             | 0.009<br>(1.55)                                                         | 0.007<br>(1.02)   | 0.003<br>(1.21)                                                        | 0.004<br>(1.47)   |
| <i>Day[0,+10]</i>                     | -0.008*<br>(-1.65)                                                      | -0.015<br>(-1.41) | -0.000<br>(-0.03)                                                      | -0.000<br>(-0.19) |
| Controls                              | yes                                                                     | yes               | yes                                                                    | yes               |
| Date Effects                          | no                                                                      | yes               | no                                                                     | yes               |
| Firm-quarter Effects                  | no                                                                      | yes               | no                                                                     | yes               |
| <i>F</i>                              | 2.773                                                                   | 1.029             | 7.331                                                                  | 5.753             |
| <i>N-obs</i>                          | 105,169                                                                 | 105,169           | 105,169                                                                | 105,169           |

This table presents results from estimating Eq. (2) for our measures of insider selling activity after differentiating between trades placed by officers and independent directors. Panel A presents results for all officers. Panel B presents results for independent directors. All variables are defined in Table 5. For parsimony, we do not tabulate coefficients on control variables or main effects. *t*-statistics appear in parentheses and are clustered by firm and date. \*, \*\*, \*\*\* indicate statistical significance (two-sided) at the 0.1, 0.05, and 0.01 levels, respectively.

**Table IA2. Insider Selling around Undisclosed Investigations: Undisclosed v. Disclosed**

| <b>Panel A. Undisclosed Investigations</b>            |                                                                |                     |                                                               |                    |
|-------------------------------------------------------|----------------------------------------------------------------|---------------------|---------------------------------------------------------------|--------------------|
|                                                       | Dependent Variable:<br><i>InsiderSalesVolume<sub>i,t</sub></i> |                     | Dependent Variable:<br><i>Pr(InsiderSeller<sub>i,t</sub>)</i> |                    |
| Variable                                              | (1)                                                            | (2)                 | (3)                                                           | (4)                |
| <i>Day[0,+10]* Severe</i>                             | 0.066**<br>(2.27)                                              | 0.044<br>(1.30)     | 0.018***<br>(2.93)                                            | 0.021***<br>(2.78) |
| <i>Day[0,+10]</i>                                     | -0.015<br>(-1.08)                                              | -0.018<br>(-1.25)   | 0.000<br>(0.10)                                               | -0.000<br>(-0.18)  |
| Controls                                              | yes                                                            | yes                 | yes                                                           | yes                |
| Date Effects                                          | no                                                             | yes                 | no                                                            | yes                |
| Firm-quarter Effects                                  | no                                                             | yes                 | no                                                            | yes                |
| <i>F</i>                                              | 4.744                                                          | 3.377               | 10.54                                                         | 9.347              |
| <i>N-obs</i>                                          | 70,423                                                         | 70,423              | 70,423                                                        | 70,423             |
| <b>Panel B. Subsequently Disclosed Investigations</b> |                                                                |                     |                                                               |                    |
|                                                       | Dependent Variable:<br><i>InsiderSalesVolume<sub>i,t</sub></i> |                     | Dependent Variable:<br><i>Pr(InsiderSeller<sub>i,t</sub>)</i> |                    |
| Variable                                              | (1)                                                            | (2)                 | (3)                                                           | (4)                |
| <i>Day[0,+10]* Severe</i>                             | 0.045<br>(1.53)                                                | 0.045<br>(1.38)     | 0.008<br>(1.51)                                               | 0.007<br>(1.20)    |
| <i>Day[0,+10]</i>                                     | -0.003<br>(-0.45)                                              | -0.021**<br>(-2.08) | -0.002<br>(-0.88)                                             | -0.005<br>(-1.59)  |
| Controls                                              | yes                                                            | yes                 | yes                                                           | yes                |
| Date Effects                                          | no                                                             | yes                 | no                                                            | yes                |
| Firm-quarter Effects                                  | no                                                             | yes                 | no                                                            | yes                |
| <i>F</i>                                              | 0.003                                                          | 0.311               | 0.015                                                         | 0.365              |
| <i>N-obs</i>                                          | 34,746                                                         | 34,746              | 34,746                                                        | 34,746             |

This table presents results from estimating Eq. (2) separately based on whether the investigation was subsequently disclosed for our measures of insider selling activity. Firm-quarter fixed effects subsume the coefficients on all of our control variables except for *BlackoutPd*, *DailyAbReturn*, and *DailyVolatility*. Panel A presents results for undisclosed investigations. Panel B presents results for investigations that are subsequently disclosed after our [0,+10] window. All variables are defined in Table 5. For parsimony, we do not tabulate coefficients on control variables. *t*-statistics appear in parentheses and are clustered by firm and date. \*, \*\*, \*\*\* indicate statistical significance (two-sided) at the 0.1, 0.05, and 0.01 levels, respectively.

**Table IA3. Falsification Tests**

| <b>Panel A. Insider Purchasing around the SEC Investigation Opening</b> |                                                              |                 |                                                            |                   |
|-------------------------------------------------------------------------|--------------------------------------------------------------|-----------------|------------------------------------------------------------|-------------------|
| Variable                                                                | Dependent Variable:<br><i>InsiderBuyVolume<sub>i,t</sub></i> |                 | Dependent Variable:<br><i>Pr(InsiderBuy<sub>i,t</sub>)</i> |                   |
|                                                                         | (1)                                                          | (2)             | (3)                                                        | (4)               |
| <i>Day[0,+10]* Severe</i>                                               | -0.011<br>(-0.87)                                            | 0.002<br>(0.16) | 0.001<br>(0.24)                                            | 0.001<br>(0.53)   |
| <i>Day[0,+10]</i>                                                       | 0.007<br>(0.66)                                              | 0.009<br>(0.73) | -0.001<br>(-0.74)                                          | -0.000<br>(-0.51) |
| Controls                                                                | yes                                                          | yes             | yes                                                        | yes               |
| Date Effects                                                            | no                                                           | yes             | no                                                         | yes               |
| Firm-quarter Effects                                                    | no                                                           | yes             | no                                                         | yes               |
| <i>F</i>                                                                | 3.180                                                        | 1.659           | 6.853                                                      | 9.452             |
| <i>N-obs</i>                                                            | 105,169                                                      | 105,169         | 105,169                                                    | 105,169           |

  

| <b>Panel B. Stock Market Reaction around the SEC Investigation Opening</b> |                                                      |                    |                                                          |                     |
|----------------------------------------------------------------------------|------------------------------------------------------|--------------------|----------------------------------------------------------|---------------------|
| Variable                                                                   | Dependent Variable:<br><i> Return<sub>i,t</sub> </i> |                    | Dependent Variable:<br><i>PublicVolume<sub>i,t</sub></i> |                     |
|                                                                            | (1)                                                  | (2)                | (3)                                                      | (4)                 |
| <i>Day[0,+10]* Severe</i>                                                  | -0.009<br>(-0.24)                                    | -0.017<br>(-0.39)  | -0.015<br>(-0.46)                                        | -0.007<br>(-0.23)   |
| <i>Day[0,+10]</i>                                                          | -0.016<br>(-1.19)                                    | -0.027*<br>(-1.80) | -0.028**<br>(-2.44)                                      | -0.028**<br>(-2.49) |
| Controls                                                                   | yes                                                  | yes                | yes                                                      | yes                 |
| Date Effects                                                               | no                                                   | yes                | no                                                       | yes                 |
| Firm-quarter Effects                                                       | no                                                   | yes                | no                                                       | yes                 |
| <i>F</i>                                                                   | 2000                                                 | 1520               | 43.83                                                    | 205.9               |
| <i>N-obs</i>                                                               | 105,169                                              | 105,169            | 105,169                                                  | 105,169             |

This table presents results from two falsification tests. Panel A presents results from estimating Eq. (2) using measures of insider purchasing. Columns (1) and (2) present results when the dependent variable is insider buying volume (*InsiderBuyVolume*). Columns (3) and (4) present results when the dependent variable is the probability that insiders are net buyers (*InsiderBuy*). *InsiderBuyVolume* is insider buying volume scaled by shares outstanding and normalized using the sample average and standard deviation. *InsiderBuy* is an indicator variable equal to one if insiders at the firm are net buyers on that day and zero otherwise. Panel B presents results from estimating Eq. (2) using measures of public trading volume and unsigned returns. Columns (1) and (2) present results when the dependent variable is public trading volume (*PublicVolume*). Columns (3) and (4) present results when the dependent variable is absolute value of daily returns

( $Return_{i,t}$ ). *PublicVolume* is daily CRSP trading volume less daily insider trading volume, scaled by shares outstanding, and normalized using the sample average and standard deviation.  $|Return_{i,t}|$  is the absolute value of the daily buy-and-hold returns listed on CRSP (inclusive of dividends). All other variables are as defined in Table 5. Columns (2) and (4) of each panel present results from including firm-quarter fixed effects. For parsimony, we do not tabulate coefficients on control variables or main effects.  $t$ -statistics appear in parentheses and are clustered by firm and date. \*, \*\*, \*\*\* indicate statistical significance (two-sided) at the 0.1, 0.05, and 0.01 levels, respectively.
